# Supplementary material for: Genomic and transcriptomic insights into Raffaelea lauricola pathogenesis
Source: PubMed Central journal article supplement (PMC7441637; doi:10.1186/s12864-020-06988-y), 2020-08-20

**Fig. S2**

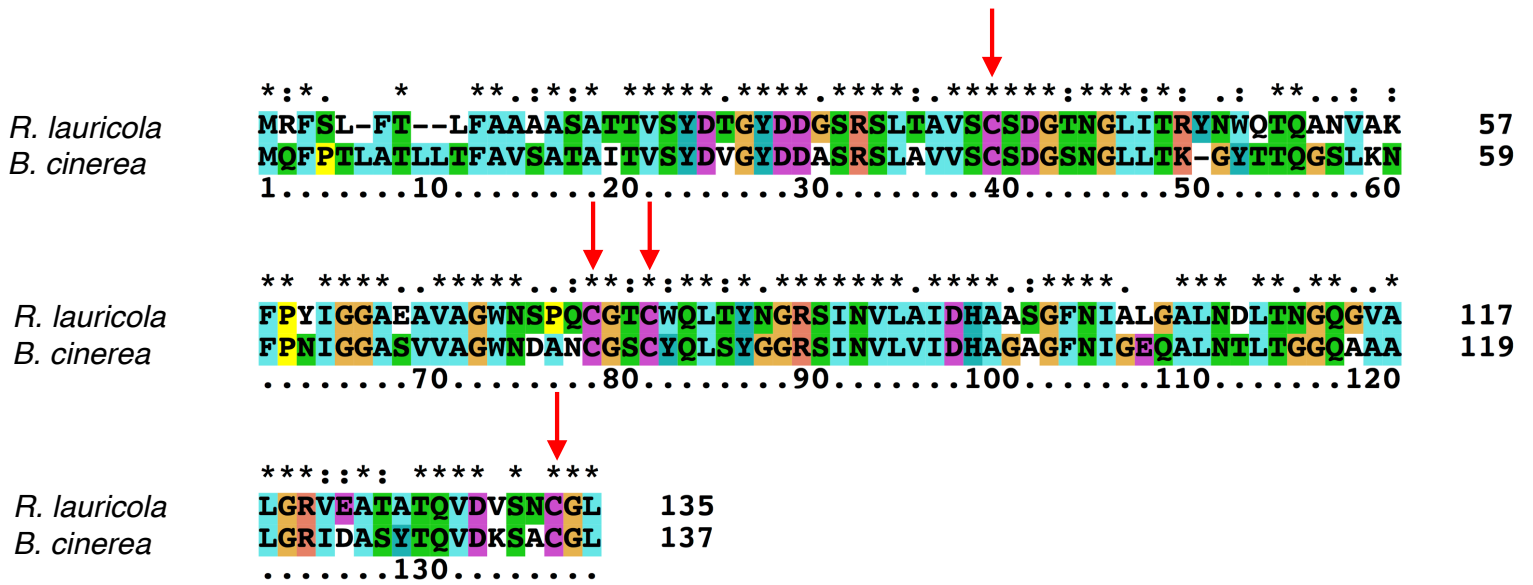

Supplement: 12864_2020_6988_MOESM2_ESM.pdf [file 12864_2020_6988_MOESM2_ESM.pdf]
